# Supplementary material for: Factors Affecting Masticatory Performance of Older Adults Are Sex-Dependent: A Cross-Sectional Study
Source: MDPI journal article supplement (doi:10.3390/ijerph192315742), 2022-11-26
Supplement: s1 [file s1]

**File S1: Questionnaire for screening for general eligibility**

- Q.1. Are you suffering from infectious diseases such as hepatitis and AIDS?
- Q.2. Are you currently suffering from diseases such as high blood pressure, diabetes, hyperlipidemia, and osteoporosis? If Yes, are you taking medicine?
- Q.3. Can you move on your own?
- Q.4. Do you have any mental problems such as cognitive impairment?
- Q.5. Are you eating normally?
- Q.6. Do you take any medicine regularly for hormone therapy or steroid therapy?
- Q.7. Do you have any painful teeth?
- Q.8. Do you have gum disease?
- Q.9. Are you undergoing dental treatment?
- Q.10. Are you wearing dentures?
- Q.11. Can you read the newspaper?
